# Supplementary material for: Efficacy of The Acupressure Wrist-Ankle Strap Combined With CBTI In Mild Insomnia Patients With Anxiety Disorders: Study Protocol For A Randomized Controlled Trial
Source: Research Square preprint supplement (doi:10.21203/rs.3.rs-414035/v1), 2021-05-26
Supplement: Supplementary file 1 [file c9f18d6fd775989702b5c3d7.docx]

# **SPIRIT Checklist for *Trials***

Complete this checklist by entering the page and line numbers where each of the items listed below can be found in your manuscript.

Your manuscript may not currently address all the items on the checklist. Please modify your text to include the missing information. If you are certain that an item does not apply, please state "n/a" and provide a short explanation. **Leaving an item blank or stating “n/a” without an explanation will lead to your manuscript being returned before review.**

Upload your completed checklist as an additional file when you submit to *Trials*. You must reference this additional file in the main text of your protocol submission. The completed SPIRIT figure must be included within the main body of the protocol text and can be downloaded here: <http://www.spirit-statement.org/schedule-of-enrolment-interventions-and-assessments/>

In your methods section, please state that you used the SPIRIT reporting guidelines, and cite them as:

Chan A-W, Tetzlaff JM, Gøtzsche PC, Altman DG, Mann H, Berlin J, Dickersin K, Hróbjartsson A, Schulz KF, Parulekar WR, Krleža-Jerić K, Laupacis A, Moher D. SPIRIT 2013 Explanation and Elaboration: Guidance for protocols of clinical trials. BMJ. 2013;346:e7586

|  |  | **Reporting Item** | **Page and Line Number** | **Reason if not applicable** |
| --- | --- | --- | --- | --- |
| **Administrative information** | | | | |
| Title | [#1](https://www.goodreports.org/reporting-checklists/spirit/info/#1) | Descriptive title identifying the study design, population, interventions, and, if applicable, trial acronym | Page 1, Line 1 - 3 | Efficacy of the acupressure wrist-ankle strap combined with CBTI in mild insomnia patients with anxiety disorders: study protocol for a randomized controlled trial |
| Trial registration | [#2a](https://www.goodreports.org/reporting-checklists/spirit/info/#2a) | Trial identifier and registry name. If not yet registered, name of intended registry | Page 15, Line 4-7 | The protocol has been approved by the supervision of Shanghai Changhai Hospital Ethics Committee (ethical approval number: CHEC2020-110) and has been registered in the Chinese Clinical Trial Registry (identifier: ChiCTR2000039352). |
| Trial registration: data set | [#2b](https://www.goodreports.org/reporting-checklists/spirit/info/#2b) | All items from the World Health Organization Trial Registration Data Set | Page 1, Line 32 | 24 October 2020 |
| Protocol version | [#3](https://www.goodreports.org/reporting-checklists/spirit/info/#3) | Date and version identifier |  | Version 2 of 28-3-2021 |
| Funding | [#4](https://www.goodreports.org/reporting-checklists/spirit/info/#4) | Sources and types of financial, material, and other support | Page 14, Line 30-33 | This trial was supported by grants from the Traditional Chinese Medicine program of Shanghai Municipal Health Commission (No. 2020LQ003), the Shanghai Science and Technology Commission medical guidance (Chinese and Western Medicine) science and technology support project (No. 19401930100) |
| Roles and responsibilities: contributorship | [#5a](https://www.goodreports.org/reporting-checklists/spirit/info/#5a) | Names, affiliations, and roles of protocol contributors | Page 14, Line 39-43 | YY participated in the conception and design of the trial, and in plans for the analysis of the data. QHZ and FFF participated in drafting the manuscript. WHL and YLY participated in data collection, and were in charge of the recruitment and treatment of patients. YY are the corresponding authors of this article. All authors discussed, read and revised the manuscript, and all approved the publication of this protocol. |
| Roles and responsibilities: sponsor contact information | [#5b](https://www.goodreports.org/reporting-checklists/spirit/info/#5b) | Name and contact information for the trial sponsor | Page 15, Line 18-20 | Address correspondence to: Ying Yuan, Department of Traditional Chinese Medicine, Naval Medical University, No. 800 Xiangying Road, Yangpu District, Shanghai 200433, China. Email: m14782395536@163.com |
| Roles and responsibilities: sponsor and funder | [#5c](https://www.goodreports.org/reporting-checklists/spirit/info/#5c) | Role of study sponsor and funders, if any, in study design; collection, management, analysis, and interpretation of data; writing of the report; and the decision to submit the report for publication, including whether they will have ultimate authority over any of these activities | Page 14, Line 30-33 | Research funding units provide financial support, and the main researchers have the final right to publish the report |
| Roles and responsibilities: committees | [#5d](https://www.goodreports.org/reporting-checklists/spirit/info/#5d) | Composition, roles, and responsibilities of the coordinating centre, steering committee, endpoint adjudication committee, data management team, and other individuals or groups overseeing the trial, if applicable (see Item 21a for data monitoring committee) | Page 12, Line 14-20 | The data will be recorded on the paper case report form by a certain assessor, and doubled-entered into the electronic case report form. Data and Safety Monitoring Committee of our hospital will monitor the data and review the progress of the trial every 3 months. Monitors will check the implementation of the study protocol, the treatment of the subjects and the completion of the informed consent documents every 3 months. The revision of the plan will be tracked and dated so that the new version can be submitted to the committee. |
| **Introduction** |  |  |  |  |
| Background and rationale | [#6a](https://www.goodreports.org/reporting-checklists/spirit/info/#6a) | Description of research question and justification for undertaking the trial, including summary of relevant studies (published and unpublished) examining benefits and harms for each intervention | Page 1, Line 7-15 | Insomnia is very common in current society, and patients are often accompanied by a certain degree of anxiety, depression, etc. Recent studies have found that the hypothalamic-pituitary-adrenal (HPA) axis excitement-inhibition state is an important indicator of sleep quality. Wrist-ankle acupuncture (WAA) is safe and effective for insomnia. The acupressure wrist-ankle straps, based on WAA theory, is a portable WAA point compression strap, which can treat diseases by automatically applying pressure to the treatment location and be operated by patients themselves. We design this trial to evaluate the clinical effect of the acupressure wrist-ankle strap in the treatment of mild insomnia patients with anxiety disorders. |
| Background and rationale: choice of comparators | [#6b](https://www.goodreports.org/reporting-checklists/spirit/info/#6b) | Explanation for choice of comparators | Page 1, Line 18-20 | In total, 108 patients diagnosed with mild insomnia patients with anxiety disorders will be randomly equally assigned into two groups, acupressure wrist-ankle strap group or non-acupressure wrist-ankle strap group |
| Objectives | [#7](https://www.goodreports.org/reporting-checklists/spirit/info/#7) | Specific objectives or hypotheses | Page 1, Line 26-30 | The results of this study will confirm the efficacy of acupressure wrist-ankle strap combined with CBTI in the treatment of mild insomnia patients with anxiety disorder and whether its mechanism is related to HPA axis. The acupressure wrist-ankle strap may become a pure physical, no side effect treatment of mild insomnia. |
| Trial design | [#8](https://www.goodreports.org/reporting-checklists/spirit/info/#8) | Description of trial design including type of trial (eg, parallel group, crossover, factorial, single group), allocation ratio, and framework (eg, superiority, equivalence, non-inferiority, exploratory) | Page 1, Line 17 | This trial is a parallel-design, patients-assessor blinded, randomized, sham-controlled. |
| **Methods: Participants, interventions, and outcomes** | | | | |
| Study setting | [#9](https://www.goodreports.org/reporting-checklists/spirit/info/#9) | Description of study settings (eg, community clinic, academic hospital) and list of countries where data will be collected. Reference to where list of study sites can be obtained | Page 3, Line 3-5 | A total of 108 participants, from the department of acupuncture and moxibustion and the department of internal medicine of traditional Chinese medicine of Shanghai Changhai Hospital. |
| Eligibility criteria | [#10](https://www.goodreports.org/reporting-checklists/spirit/info/#10) | Inclusion and exclusion criteria for participants. If applicable, eligibility criteria for study centres and individuals who will perform the interventions (eg, surgeons, psychotherapists) | Page 5, Line 16-29 | Inclusion criteria  Eligibility for participation requires each of the following criteria be met:   - Symptoms comply with both the Guidelines for the Diagnosis and Treatment of Insomnia in China formulated by the CSMC in 2017 and Expert Consensus on Diagnosis and Treatment of Anxiety and Depression in General Hospitals formulated by Anxiety disorder cooperation group, Psychiatry Branch, CMA in 2012 - The occurrence of insomnia was 3 times (including) to 5 times per week. - The Pittsburgh Sleep Quality Index (PSQI) score was 7 to 11, and the Hamilton Anxiety Scale (HAMA) score> 14. - Age 18-70 years at the time of enrollment (either sex). - Haven’t received WAA or other similar treatments. - Unwilling to use any drugs. - Signed informed consent. |
| Interventions: description | [#11a](https://www.goodreports.org/reporting-checklists/spirit/info/#11a) | Interventions for each group with sufficient detail to allow replication, including how and when they will be administered | Page 8, Line 1-19 | Acupressure wrist-ankle strap group  This group is the intervention group. A portable WAA’ point compression therapy device is used, with compression components on the inside; the bilateral upper 1 are selected as the compression points. The upper 1 is located at the depression between medial border of the ulnar and the tendon of musculus flexor carpi ulnaris, and at the level of about two fingers above the transverse crease of the wrist. A compression component is installed inside the wrist-ankle strap and worn on both wrists to ensure that the compression component can be compressed to the upper 1 compression point.  Non-acupressure wrist-ankle strap group  This group served as the control group. A portable WAA’ point compression therapy device is selected. The inner compression component will automatically contract without compression, and it will be worn at the same position on both wrists. |
| Interventions: modifications | [#11b](https://www.goodreports.org/reporting-checklists/spirit/info/#11b) | Criteria for discontinuing or modifying allocated interventions for a given trial participant (eg, drug dose change in response to harms, participant request, or improving / worsening disease) | Page 5, Line 31-39 | Exclusion criteria  Patients who meet any of the following criteria will be excluded:   - Suffering from insomnia caused by mental diseases or drugs. - Dependence or abuse of alcohol or other substances. - Currently pregnant or lactating. - Having any serious disease of cardiovascular, liver, kidney, hematopoietic system, and mental patients. - Allergic to the material of the wrist-ankle straps. - Have taken sedative and hypnotic drugs within 1 month. |
| Interventions: adherance | [#11c](https://www.goodreports.org/reporting-checklists/spirit/info/#11c) | Strategies to improve adherence to intervention protocols, and any procedures for monitoring adherence (eg, drug tablet return; laboratory tests). Also relevant for non-pharmacological RCTs. | Page 6, Line 1-15 | Dropout criteria  The researcher decides to withdraw from the trial:   - Patient’s condition progressed or continues to deteriorate during the trial, and the clinical trial should be stopped according to the doctor's judgment. - During the trial period, patient has severe complications or special physiological changes, and it is not suitable to continue the test. - Serious adverse events occurred during the trial period. - Patient has poor compliance during the trial period, and the treatment dose was less than 80% or more than 120%.   Patients quit the trial by themselves:   - During the trial period, patients are unwilling to continue the treatment or take sedative and hypnotic drugs by themselves due to various reasons, and actively propose to withdraw from the clinical trial. - Although the patients don’t explicitly propose to withdraw from the trial, they might fall out naturally due to loss of follow-up. |
| Interventions: concomitant care | [#11d](https://www.goodreports.org/reporting-checklists/spirit/info/#11d) | Relevant concomitant care and interventions that are permitted or prohibited during the trial | Page 9, Line 6-11 | In addition, all patients will be given sleep hygiene education and CBTI. CBTI can effectively correct the wrong sleep cognition and inappropriate behavior factors of patients with insomnia, help alleviate the difficulty of falling asleep, increase sleep time, improve sleep efficiency, improve sleep quality, eliminate psychological and physiological high wakefulness, enhance the drive to fall asleep, reconstruct correct sleep and awakening cognitive model, and can maintain long-term efficacy. |
| Outcomes | [#12](https://www.goodreports.org/reporting-checklists/spirit/info/#12) | Primary, secondary, and other outcomes, including the specific measurement variable (eg, systolic blood pressure), analysis metric (eg, change from baseline, final value, time to event), method of aggregation (eg, median, proportion), and time point for each outcome. Explanation of the clinical relevance of chosen efficacy and harm outcomes is strongly recommended | Page 10 and 11, Line 4-33,1-16 | Primary outcome  Primary outcome is the Pittsburgh sleep quality index aggregate score（PSQI）, which is used to evaluate patient’s general sleep quality in the past month. The PSQI consists of 19 self-assessment questions and 5 questions assessed by sleep partners. Only 19 self-assessment questions will be scored. The 19 self-assessment questions constitute 7 factors from 0 to 3 points. The cumulative score of each factor component is the total score of the PSQI. The total score ranges from 0 to 21. Higher score means worse sleep quality[[1]](#endnote-1). The PSQI will be assessed at baseline, 4, 8 weeks after randomization and flow-up period.  Secondary outcomes  Pittsburgh Sleep Quality Index（PSQI） The PSQI scores include seven domains, using 0, 1, 2, and 3 points to evaluate the patient’s duration of sleep, sleep disturbance, sleep-onset latency, daytime dysfunction due to night sleep, sleep efficiency, need for medications to sleep, and overall sleep quality，which will be assessed at baseline, 4, 8 weeks after randomization and flow-up period.  Hamilton Anxiety Scale (HAMA) The HAMA is one of the commonly used scales in psychiatric clinics, including 14 items. As an important diagnostic tool for anxiety disorders, it is often used clinically as a basis for the diagnosis and degree classification of anxiety disorders. According to the relevant data of the scale cooperation group in China, if the score is less than 7, there is no anxiety; if the score is more than 7, there may be anxiety; if the score is more than 14, there must be anxiety; if the score exceeds 21 points, there must be obvious anxiety; if the total score exceeds 29 points, it may be serious anxiety. If the score of the scale is more than 14, it can be diagnosed as anxiety disorder. HAMA will be assessed at baseline, 4, 8 weeks after randomization and flow-up period.  wActiSleep-BT monitor The Actigraphy is a small-sized wrist watch worn on the patient’s wrist before going to bed, it can monitor the quality of sleep, such as the latency to fall asleep, total sleep time, number and duration of wake-ups, and sleep efficiency. The main sleep parameters are SE, total sleep time (TST) and sleep awakenings (SA). It will be assessed at baseline, 4, 8 weeks after randomization and flow-up period.  Laboratory tests The pathogenesis of insomnia is that some substances in the brain (such as neurotransmitters, hormones, etc.) act on the sleep center of the human body under the influence of various factors, leading to the abnormality of the central neurotransmitter system, and then affect sleep. There is some evidence6、7 that the pathogenesis of insomnia is closely related to the circadian secretion of peripheral blood-related hormones in the hypothalamus-pituitary-adrenal axis (HPA axis). In this study, we will detect the levels of adrenocorticotropic hormone (ACTH), cortisol (CORT), serotonin (5-HT), norepinephrine (NE) before and after treatment in the two groups.  TCM Syndrome Score Scale: Syndrome is the objective basis of syndrome differentiation and treatment in TCM. The object of this study is mild insomnia patients with anxiety disorders. So the TCM syndrome score scale includes insomnia part and depression part, the sum of the two is the total score. The syndrome scale with the characteristics of TCM theory is a necessary way to realize the standardization of TCM syndrome diagnosis and evaluation. |
| Participant timeline | [#13](https://www.goodreports.org/reporting-checklists/spirit/info/#13) | Time schedule of enrolment, interventions (including any run-ins and washouts), assessments, and visits for participants. A schematic diagram is highly recommended (see Figure) | Page 9 and 10 |  |
| Sample size | [#14](https://www.goodreports.org/reporting-checklists/spirit/info/#14) | Estimated number of participants needed to achieve study objectives and how it was determined, including clinical and statistical assumptions supporting any sample size calculations | Page 11 and 12, Line 38-39,1-11 | Sample size  PASS 11 software (NCSS, Kaysville, UT) was used to calculate the required sample size. The sample size calculation formula as follows:  Sample size calculation is based on the primary outcome, which is proposed to be the PSQI. Based on the preliminary experiments, the PSQI aggregate score of the acupressure wrist-ankle strap group was 6.125±2.93, and the PSQI aggregate score of the control group was 8.625±3.77. The number of cases in the two groups was 8 cases respectively. The combined standard deviation of the two groups was calculated to be 3.60. That is, in the formula, =6.125,=8.625, =1, and =3.60. In this study, α=0.05 and 1-β=0.9, therefore 1.96，1.28. 45 patients are required for each group. Considering an estimated 20% dropout rate, 54 patients will be enrolled in each group, giving a total of 108 patients. |
| Recruitment | [#15](https://www.goodreports.org/reporting-checklists/spirit/info/#15) | Strategies for achieving adequate participant enrolment to reach target sample size |  |  |
| **Methods: Assignment of interventions (for controlled trials)** | | | | |
| Allocation: sequence generation | [#16a](https://www.goodreports.org/reporting-checklists/spirit/info/#16a) | Method of generating the allocation sequence (eg, computer-generated random numbers), and list of any factors for stratification. To reduce predictability of a random sequence, details of any planned restriction (eg, blocking) should be provided in a separate document that is unavailable to those who enrol participants or assign interventions | Page 6, Line 18-20 | Random sequence list is generated by using stratified block randomization design and SAS 9.4 (SAS Institute Inc., Cary, NC, USA). The sequence is stratified by gender and age. |
| Allocation concealment mechanism | [#16b](https://www.goodreports.org/reporting-checklists/spirit/info/#16b) | Mechanism of implementing the allocation sequence (eg, central telephone; sequentially numbered, opaque, sealed envelopes), describing any steps to conceal the sequence until interventions are assigned | Page 6, Line 20-24 | This trial has an independent statistician, assigning the eligible patients to the corresponding intervention code based on the list, who is not be involved in recruitment, implementation, data collection and data analysis of this trial. All of the random code information is kept by a certain person and stored in sealed opaque envelops. |
| Allocation: implementation | [#16c](https://www.goodreports.org/reporting-checklists/spirit/info/#16c) | Who will generate the allocation sequence, who will enrol participants, and who will assign participants to interventions | Page 6, Line 24-29 | When an eligible patient is enrolled in the group, The statistician will randomized according to the above method, and the corresponding box within wrist-ankle strap will be given to the researcher who will be responsible for informing patients the details about the implementation, the wrist-ankle straps used in both groups will have the same packaging. The allocation concealment procedure will not be exposed until the clinical trial finished completely. |
| Blinding (masking) | [#17a](https://www.goodreports.org/reporting-checklists/spirit/info/#17a) | Who will be blinded after assignment to interventions (eg, trial participants, care providers, outcome assessors, data analysts), and how | Page 6, Line 32-41 | All the patients, outcome assessors, and data analyst will be blinded to treatment allocation. Every patient of the two groups will receive the same packaging box in the above envelope after entering the group according to the allocation method, which contains the strap (acupressure wrist-ankle strap or non-acupressure wrist-ankle strap) and its instructions, which will guide patients themselves how to use the straps and informed them related precautions, including the size of the straps, tightness, selection and adjustment of compression devices and wearing time. In order to prevent the patients from communicating with each other, the form of follow-up appointments is adopted to ensure that the patients will stagger their visits and avoid communication. |
| Blinding (masking): emergency unblinding | [#17b](https://www.goodreports.org/reporting-checklists/spirit/info/#17b) | If blinded, circumstances under which unblinding is permissible, and procedure for revealing a participant’s allocated intervention during the trial | Page 6, Line 41-42 | When the patient withdraws from the trial due to various reasons, emergency unblinding is allowed. |
| **Methods: Data collection, management, and analysis** | | | | |
| Data collection plan | [#18a](https://www.goodreports.org/reporting-checklists/spirit/info/#18a) | Plans for assessment and collection of outcome, baseline, and other trial data, including any related processes to promote data quality (eg, duplicate measurements, training of assessors) and a description of study instruments (eg, questionnaires, laboratory tests) along with their reliability and validity, if known. Reference to where data collection forms can be found, if not in the protocol | Page 11, Line 22-25 | Participants will complete relevant questionnaires and laboratory tests at the first visit. Researchers will provide guidance to ensure the reliability and validity of the questionnaire; meanwhile, sleep monitor will be completed the night before the treatment. |
| Data collection plan: retention | [#18b](https://www.goodreports.org/reporting-checklists/spirit/info/#18b) | Plans to promote participant retention and complete follow-up, including list of any outcome data to be collected for participants who discontinue or deviate from intervention protocols | Page 11, Line 26-29 | All observation results will be documented in the clinical observation forms. At the some time, a computer database will be established. The obtained data will be input into the computer on the day of observation records. SPSS 21.0 will be used for statistical processing. |
| Data management | [#19](https://www.goodreports.org/reporting-checklists/spirit/info/#19) | Plans for data entry, coding, security, and storage, including any related processes to promote data quality (eg, double data entry; range checks for data values). Reference to where details of data management procedures can be found, if not in the protocol | Page 11, Line 29 | SPSS 21.0 will be used for statistical processing. |
| Statistics: outcomes | [#20a](https://www.goodreports.org/reporting-checklists/spirit/info/#20a) | Statistical methods for analysing primary and secondary outcomes. Reference to where other details of the statistical analysis plan can be found, if not in the protocol | Page 11, Line 29-35 | After normal distribution test and homogeneity test of variance are performed on measurement data, analysis of variance of repeated measurements will be used for comparison between groups, paired t test will be used for comparison before and after treatment, and non-normal distribution data will be used for non-parametric test. The statistical data will be compared by χ2 test. The difference will be considered statistically significant when P < 0.05. |
| Statistics: additional analyses | [#20b](https://www.goodreports.org/reporting-checklists/spirit/info/#20b) | Methods for any additional analyses (eg, subgroup and adjusted analyses) | N/A | Not applicable, no subgroup analyses |
| Statistics: analysis population and missing data | [#20c](https://www.goodreports.org/reporting-checklists/spirit/info/#20c) | Definition of analysis population relating to protocol non-adherence (eg, as randomised analysis), and any statistical methods to handle missing data (eg, multiple imputation) | Page 11, Line 27 | Missing data will be eliminated. |
| **Methods: Monitoring** | | | | |
| Data monitoring: formal committee | [#21a](https://www.goodreports.org/reporting-checklists/spirit/info/#21a) | Composition of data monitoring committee (DMC); summary of its role and reporting structure; statement of whether it is independent from the sponsor and competing interests; and reference to where further details about its charter can be found, if not in the protocol. Alternatively, an explanation of why a DMC is not needed | Page 12, Line 14-20 | The data will be recorded on the paper case report form by a certain assessor, and doubled-entered into the electronic case report form. Data and Safety Monitoring Committee of our hospital will monitor the data and review the progress of the trial every 3 months. Monitors will check the implementation of the study protocol, the treatment of the subjects and the completion of the informed consent documents every 3 months. The revision of the plan will be tracked and dated so that the new version can be submitted to the committee. |
| Data monitoring: interim analysis | [#21b](https://www.goodreports.org/reporting-checklists/spirit/info/#21b) | Description of any interim analyses and stopping guidelines, including who will have access to these interim results and make the final decision to terminate the trial | N/A | Not applicable, no interim-analysis. |
| Harms | [#22](https://www.goodreports.org/reporting-checklists/spirit/info/#22) | Plans for collecting, assessing, reporting, and managing solicited and spontaneously reported adverse events and other unintended effects of trial interventions or trial conduct | Page 12, Line 23-29 | The acupressure wrist-ankle strap is pure physical therapy, which is safe. Patients need to pay attention not to wear it too tightly or for too long. After wearing it for about 30 minutes, take it off or loosen it to prevent pressure from causing poor local blood circulation. If the skin is itchy and rash occurs after wearing it, it may be allergic. Patients will be told to stop using the strap and be arranged for a dermatologist. If insomnia worsens after multiple treatments, the patient will be referred to the Department of Neurology for other forms of treatment. |
| Auditing | [#23](https://www.goodreports.org/reporting-checklists/spirit/info/#23) | Frequency and procedures for auditing trial conduct, if any, and whether the process will be independent from investigators and the sponsor | Page 12, Line 15-20 | Data and Safety Monitoring Committee of our hospital will monitor the data and review the progress of the trial every 3 months. Monitors will check the implementation of the study protocol, the treatment of the subjects and the completion of the informed consent documents every 3 months. |
| **Ethics and dissemination** | | | | |
| Research ethics approval | [#24](https://www.goodreports.org/reporting-checklists/spirit/info/#24) | Plans for seeking research ethics committee / institutional review board (REC / IRB) approval including the committee’s reference number (if applicable) | Page 15, Line 3-8 | This study will be performed according to the guidance and principles of the Declaration of Helsinki. The protocol has been approved by the supervision of Shanghai Changhai Hospital Ethics Committee (ethical approval number: CHEC2020-110) and has been registered in the Chinese Clinical Trial Registry (identifier: ChiCTR2000039352). Only patients who have signed the informed consent form will be included. |
| Protocol amendments | [#25](https://www.goodreports.org/reporting-checklists/spirit/info/#25) | Plans for communicating important protocol modifications (eg, changes to eligibility criteria, outcomes, analyses) to relevant parties (eg, investigators, REC / IRBs, trial participants, trial registries, journals, regulators) | Page 12, Line 19-20 | The revision of the plan will be tracked and dated so that the new version can be submitted to the committee. |
| Consent or assent | [#26a](https://www.goodreports.org/reporting-checklists/spirit/info/#26a) | Who will obtain informed consent or assent from potential trial participants or authorised surrogates, and how (see Item 32) | Page 5, Line29 | Inclusion criteria   - Signed informed consent. |
| Consent or assent: ancillary studies | [#26b](https://www.goodreports.org/reporting-checklists/spirit/info/#26b) | Additional consent provisions for collection and use of participant data and biological specimens in ancillary studies, if applicable | N/A | Not applicable, no ancillary studies |
| Confidentiality | [#27](https://www.goodreports.org/reporting-checklists/spirit/info/#27) | How personal information about potential and enrolled participants will be collected, shared, and maintained in order to protect confidentiality before, during, and after the trial | Page12, Line23-26 | All counseling and blood draws will be conducted in private rooms, and study staff will be required to sign agreements to preserve the confidentiality of all participants. Participants’ study information will not be released outside of the study without the written permission of the participant. |
| Declaration of interests | [#28](https://www.goodreports.org/reporting-checklists/spirit/info/#28) | Financial and other competing interests for principal investigators for the overall trial and each study site | Page9, Line17 | The authors declare that they have no competing interests. |
| Data access | [#29](https://www.goodreports.org/reporting-checklists/spirit/info/#29) | Statement of who will have access to the final trial dataset, and disclosure of contractual agreements that limit such access for investigators | Page12, Line20-24 | All researchers will be given access to the cleaned data sets. All data sets will be password protected. Project Principal Investigators will have direct access to their own site’s data sets, and will have access to other sites data by request. To ensure confidentiality, data dispersed to project team members will be blinded of any identifying participant information. |
| Ancillary and post trial care | [#30](https://www.goodreports.org/reporting-checklists/spirit/info/#30) | Provisions, if any, for ancillary and post-trial care, and for compensation to those who suffer harm from trial participation | Page12, Line30-37 | The acupressure wrist-ankle strap is pure physical therapy, which is safe. Patients need to pay attention not to wear it too tightly or for too long. After wearing it for about 30 minutes, take it off or loosen it to prevent pressure from causing poor local blood circulation. If the skin is itchy and rash occurs after wearing it, it may be allergic. Patients will be told to stop using the strap and be arranged for a dermatologist. If insomnia worsens after multiple treatments, the patient will be referred to the Department of Neurology for other forms of treatment. |
| Dissemination policy: trial results | [#31a](https://www.goodreports.org/reporting-checklists/spirit/info/#31a) | Plans for investigators and sponsor to communicate trial results to participants, healthcare professionals, the public, and other relevant groups (eg, via publication, reporting in results databases, or other data sharing arrangements), including any publication restrictions | N/A | According to the requirements of China clinical trial registration center, the trial data will be uploaded to the website within 6 months after the trial |
| Dissemination policy: authorship | [#31b](https://www.goodreports.org/reporting-checklists/spirit/info/#31b) | Authorship eligibility guidelines and any intended use of professional writers | Page14, Line39-43 | YY participated in the conception and design of the trial, and in plans for the analysis of the data. QHZ and FFF participated in drafting the manuscript. WHL and YLY participated in data collection, and were in charge of the recruitment and treatment of patients. YY are the corresponding authors of this article. All authors discussed, read and revised the manuscript, and all approved the publication of this protocol. |
| Dissemination policy: reproducible research | [#31c](https://www.goodreports.org/reporting-checklists/spirit/info/#31c) | Plans, if any, for granting public access to the full protocol, participant-level dataset, and statistical code | N/A | Not mentioned in the paper, but according to the requirements of China clinical trial registration center, the trial data will be uploaded to the website within 6 months after the trial |
| **Appendices** | | | | |
| Informed consent materials | [#32](https://www.goodreports.org/reporting-checklists/spirit/info/#32) | Model consent form and other related documentation given to participants and authorised surrogates | N/A | Refer to attachment |
| Biological specimens | [#33](https://www.goodreports.org/reporting-checklists/spirit/info/#33) | Plans for collection, laboratory evaluation, and storage of biological specimens for genetic or molecular analysis in the current trial and for future use in ancillary studies, if applicable | N/A | It is not applicable. The blood sampling and test indexes of this experiment are completed by the laboratory of the hospital, and the blood samples are not analyzed. |

It is strongly recommended that this checklist be read in conjunction with the SPIRIT 2013 Explanation & Elaboration for important clarification on the items. Amendments to the protocol should be tracked and dated. The SPIRIT checklist is copyrighted by the SPIRIT Group under the Creative Commons “[Attribution-NonCommercial-NoDerivs 3.0 Unported](http://www.creativecommons.org/licenses/by-nc-nd/3.0/)” license. This checklist can be completed online using https://www.goodreports.org/, a tool made by the EQUATOR Network in collaboration with Penelope.ai

1. Atalay H. Comorbidity of insomnia detected by the Pittsburgh sleep quality index with anxiety, depression and personality disorders. Isr J Psychiatry Relat Sci. 2011;48(1):54-9. PMID: 21572244. [↑](#endnote-ref-1)
